# Supplementary material for: Local sympathetic denervation attenuates myocardial inflammation and improves cardiac function after myocardial infarction in mice
Source: PubMed Central journal article supplement — Cardiovasc Res. 2017 Nov 24;114(2):291–9. doi: 10.1093/cvr/cvx227 (PMC5852629; doi:10.1093/cvr/cvx227), 2017-11-24
Supplement: supplementar_figures_cvx227.pdf [file supplementar_figures_cvx227.pdf]

# Supplementary Figure 1

**A**

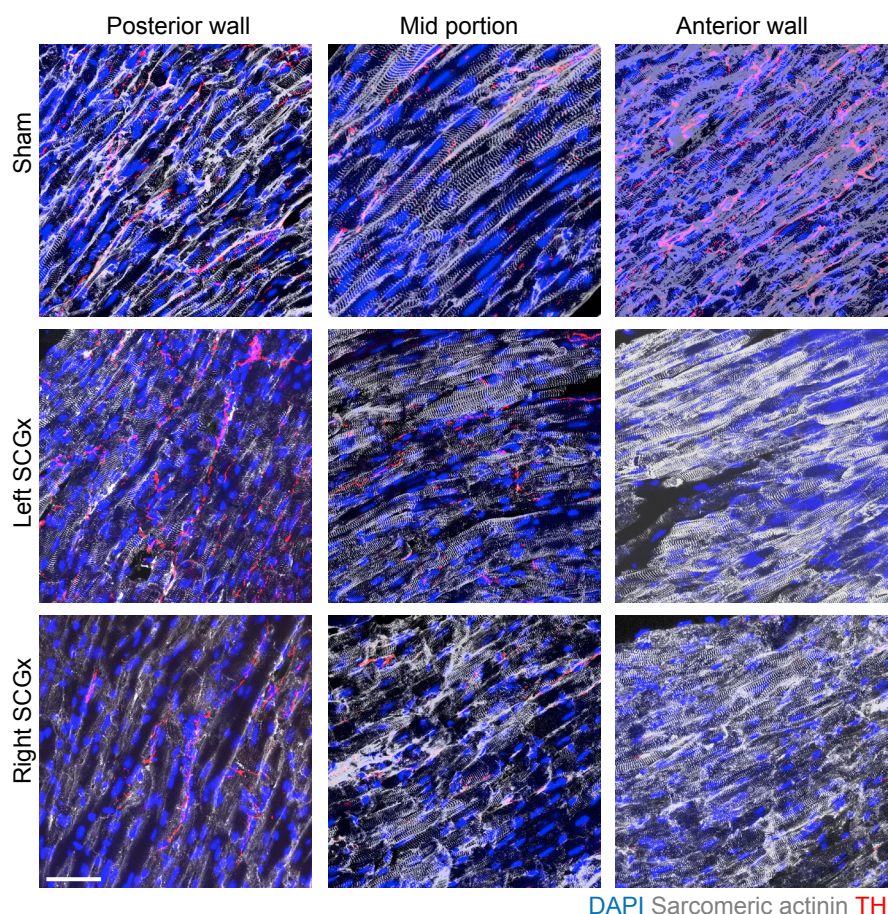

**B**

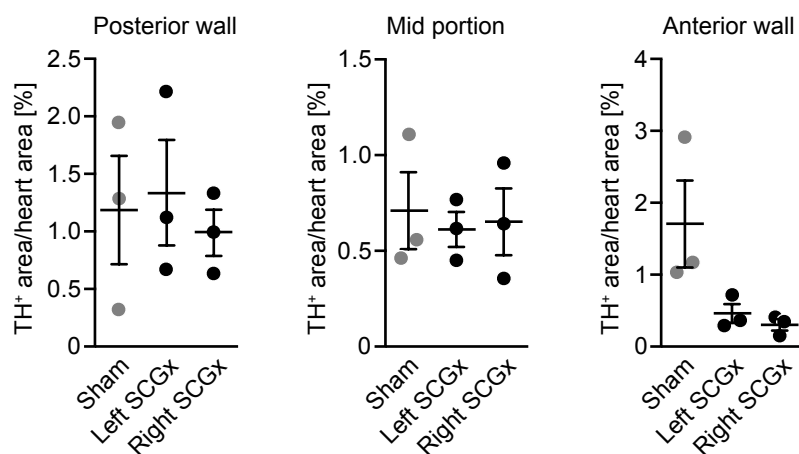

## Supplementary Figure 1. Contribution of the SCG to sympathetic innervation of different heart regions.

(A) Immunofluorescence staining for sympathetic nerves (anti-TH) and cardiac myocytes (anti-sarcomeric actinin) 14 days after unilateral (i.e. left or right) removal of the respective SCG. Scale bar: 20  $\mu$ m.

(B) Quantification of the results.

Data are mean  $\pm$  SEM of n = 3 animals per group.

## Supplementary Figure 2

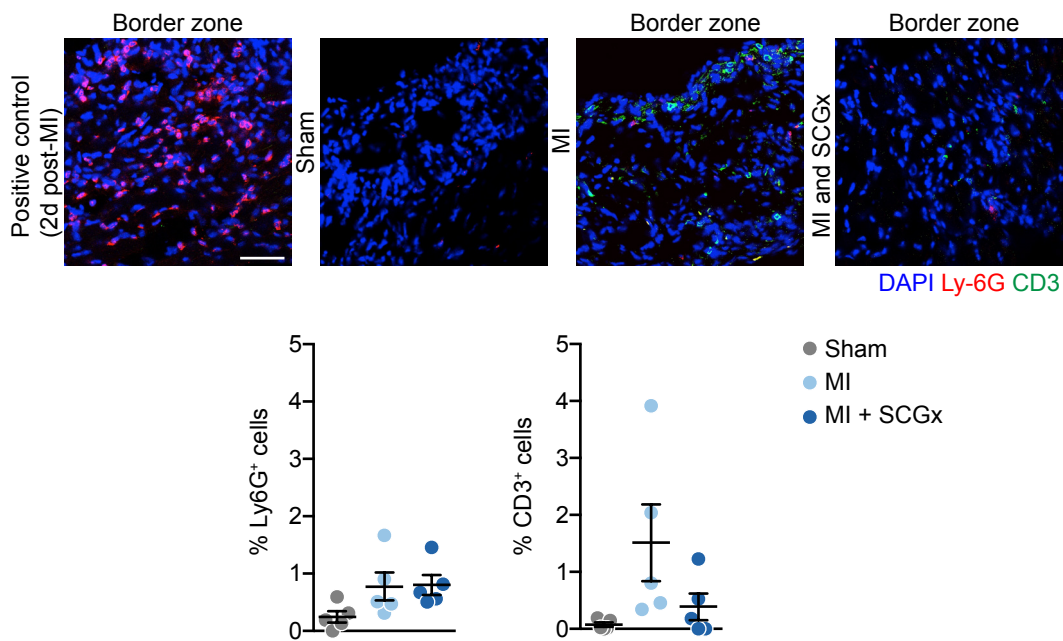

### Supplementary Figure 2. Effect of sympathetic denervation on cardiac inflammatory response.

(Upper panel) Immunofluorescence staining of neutrophils (anti-Ly6G) and T-cells (anti-CD3). Freshly infarcted tissue two days after induction of MI served as a positive control. Scale bar: 20  $\mu$ m. (Lower panel) Quantification of the results. Data are mean  $\pm$  SEM of n = 5 animals per group.

## Supplementary Figure 3

|                       | Sham  | SCGx  | MI    | MI + SCGx |
|-----------------------|-------|-------|-------|-----------|
| Mean Heart rate [bpm] | 437.4 | 406.1 | 461.3 | 464.7     |
| Std. Error of Mean    | 15.6  | 25.6  | 53.6  | 24.2      |
| n-number              | 9     | 7     | 6     | 6         |

**Supplementary Figure 3. Heart rate in the four experimental groups.**
